# Supplementary material for: Association Between Black Race, Clinical Severity, and Management of Acute Pulmonary Embolism: A Retrospective Cohort Study
Source: PubMed Central journal article supplement — J Am Heart Assoc. 2021 Aug 25;10(17):e021818. doi: 10.1161/JAHA.121.021818 (PMC8649302; doi:10.1161/jaha.121.021818), 2021-08-25
Supplement: JAH3-10-e021818-s001.pdf [file JAH3-10-e021818-s001.pdf]

# **SUPPLEMENTAL MATERIAL**

**Table S1. Current Procedural Terminology codes, descriptions, and categorization for interventions.**

| Intervention type                    | Current Procedural Terminology code | Description                                                                                                                                                                                                                                                                                       |
|--------------------------------------|-------------------------------------|---------------------------------------------------------------------------------------------------------------------------------------------------------------------------------------------------------------------------------------------------------------------------------------------------|
| <b>Systemic treatment</b>            |                                     |                                                                                                                                                                                                                                                                                                   |
| Systemic thrombolysis                |                                     | Inpatient pharmacy administration record for thrombolytic therapy‡                                                                                                                                                                                                                                |
| <b>Local treatment</b>               |                                     |                                                                                                                                                                                                                                                                                                   |
| Catheter directed intervention (CDI) | 36013*†; 36014*†; 36015*†           | Introduction of catheter, right heart or main pulmonary artery; left or right pulmonary artery; segmental or subsegmental pulmonary artery                                                                                                                                                        |
|                                      | 37212† or 37201*; 37213†; 37214†    | Transcatheter therapy, venous infusion for thrombolysis, any method, including radiological supervision and interpretation, initial treatment day; subsequent day during course of thrombolytic therapy; cessation of thrombolysis including removal of catheter and vessel closure by any method |
|                                      | 37187*†; 37188†;                    | Percutaneous transluminal venous mechanical thrombectomy, including intraprocedural pharmacological thrombolytic injections and fluoroscopic guidance; subsequent day during course of therapy                                                                                                    |
| Surgical embolectomy                 | 33910*†; 33915*†                    | Pulmonary artery embolectomy with cardiopulmonary bypass; without cardiopulmonary bypass                                                                                                                                                                                                          |
| <b>Preventative</b>                  |                                     |                                                                                                                                                                                                                                                                                                   |
| Inferior vena cava filter placement  | 37191† or 75940*                    | Insertion of intravascular vena cava filter, endovascular approach including vascular access, vessel selection, and radiological supervision and interpretation                                                                                                                                   |

\* *Current Procedural Terminology* 2010 edition, Category I codes

† *Current Procedural Terminology* 2013, 2015, and 2016 edition, Category I codes

‡ Patients were identified as receiving any pharmacologic dose of any thrombolytic medication (including alteplase, reteplase, and tenecteplase). Charts for patients who were not known to receive a catheter directed intervention (catheter directed thrombolysis) were reviewed for dosing and indication of thrombolytic administration.

**Table S2. Data missingness in the matched cohort.**

| <b>Preoperative Variables*</b>                 | <b>White<br/>(n=3264)</b> | <b>Black<br/>(n=1210)</b> | <b>P</b> |
|------------------------------------------------|---------------------------|---------------------------|----------|
| <b>Demographics, No. (%)</b>                   |                           |                           |          |
| Area of deprivation index                      | 132 (4.0%)                | 62 (5.1%)                 | .120     |
| <b>Comorbid conditions</b>                     |                           |                           |          |
| Venous thromboembolism                         | 3 (0.1%)                  | 2 (0.2%)                  | .510     |
| Smoking history                                | 49 (1.5%)                 | 18 (1.5%)                 | .970     |
| Body mass index $\geq$ 35 kg/m <sup>2</sup>    | 64 (2.0%)                 | 28 (2.3%)                 | .460     |
| <b>Medications prior to hospital admission</b> |                           |                           |          |
| Aspirin                                        | 187 (5.7%)                | 72 (6.0%)                 | .780     |
| Anticoagulation†                               | 187 (5.7%)                | 72 (6.0%)                 | .780     |
| <b>Hospital admission ‡</b>                    |                           |                           |          |
| Laboratory value                               |                           |                           |          |
| Troponin-I§                                    | 1645 (50.4%)              | 575 (47.5%)               | .087     |
| B-type Natriuretic Peptide§                    | 2561 (78.5%)              | 980 (81.0%)               | .064     |
| Creatinine                                     | 253 (7.8%)                | 81 (6.7%)                 | .230     |
| Hemoglobin                                     | 114 (3.5%)                | 36 (3.0%)                 | .390     |
| International normalized ratio                 | 1101 (33.7%)              | 337 (27.9%)               | <.001    |

\*All data not included within the table has no missingness within the matched cohort.

† Anti-coagulation therapies include the presence of warfarin, dabigatran, rivaroxaban, edoxaban, or apixaban prior to admission.

‡ Maximum initially recorded vital sign or resulted laboratory value which first resulted upon admission to the transferring or treating hospital.

§ Missing values for Troponin-I and B-type Natriuretic Peptide were not clinically indicated as determined by the treatment team.

**Table S3. Definitions and clinical adjudication of pulmonary embolism severity on presentation.**

| Pulmonary embolism severity | Indicators               |                       |                     |                      |
|-----------------------------|--------------------------|-----------------------|---------------------|----------------------|
|                             | Hemodynamic instability* | Clinical parameters†  | Right heart strain‡ | Elevated biomarkers§ |
| <b>High</b>                 | +                        | +                     | +                   | +                    |
| <b>Intermediate</b>         | -                        | <i>At least one +</i> |                     |                      |
|                             |                          | +/-                   | +/-                 | +/-                  |
| <b>Low</b>                  | -                        | -                     | -                   | -                    |
| Reviewer 2                  |                          |                       |                     |                      |
| Reviewer 1                  | High                     | Intermediate          | Low                 | Total                |
| <b>High</b>                 | 15                       | 0                     | 0                   | 15                   |
| <b>Intermediate</b>         | 0                        | 15                    | 0                   | 15                   |
| <b>Low</b>                  | 0                        | 0                     | 15                  | 15                   |

\* Cardiac arrest, vasopressor requirement, or systolic blood pressure <90 mm Hg<sup>20-21</sup>

† Simplified pulmonary embolism severity index (sPESI > 0 or intensive care unit admission<sup>22</sup>)

‡ Right ventricular dysfunction on echocardiogram

§ Troponin-I (ng/mL) or B-type natriuretic peptide (pg/mL)

|| On initial review, one patient was found to be mis-classified by our coding algorithm to intermediate severity when clinically they had a low severity PE. This led to recognition and correction of the coding error and the results shown are upon secondary review.

Percent agreement between two reviewers of PE severity on clinical adjudication was 100% in each PE severity.

**Table S4. Baseline and hospitalization characteristics for included and excluded patients after matching.**

| Preoperative Variables                         | White                |                      | Black                |                     |
|------------------------------------------------|----------------------|----------------------|----------------------|---------------------|
|                                                | Included<br>(n=3264) | Excluded<br>(n=4228) | Included<br>(n=1210) | Excluded<br>(n=41)  |
| <b>Demographics</b>                            |                      |                      |                      |                     |
| Age, years                                     | 56.8 ( $\pm$ 17.0)   | 68.0 ( $\pm$ 14.5)   | 55.1 ( $\pm$ 17.5)   | 38.6 ( $\pm$ 17.9)  |
| Female sex                                     | 1769 (54.2%)         | 2096 (49.6%)         | 672 (55.5%)          | 30 (73.2%)          |
| Hispanic ethnicity                             | 20 (0.6%)            | 16 (0.4%)            | 4 (0.3%)             | 0 (0.0%)            |
| Area of deprivation index                      | 58.8 ( $\pm$ 23.5)   | 57.4 ( $\pm$ 23.5)   | 80.6 ( $\pm$ 21.4)   | 86.5 ( $\pm$ 15.2)  |
| <b>Insurance</b>                               |                      |                      |                      |                     |
| Commercial                                     | 1274 (39.0%)         | 1024 (24.2%)         | 231 (19.1%)          | 7 (17.1%)           |
| Medicaid                                       | 504 (15.4%)          | 345 (8.2%)           | 395 (32.6%)          | 19 (46.3%)          |
| Medicare                                       | 1395 (42.7%)         | 2784 (65.8%)         | 517 (42.7%)          | 11 (26.8%)          |
| Self-Pay/ Other                                | 91 (2.8%)            | 75 (1.8%)            | 67 (5.5%)            | 4 (9.8%)            |
| <b>Comorbid conditions</b>                     |                      |                      |                      |                     |
| Cerebrovascular event*                         | 208 (6.4%)           | 366 (8.7%)           | 115 (9.5%)           | 0 (0.0%)            |
| Diabetes mellitus                              | 532 (16.3%)          | 735 (17.4%)          | 265 (21.9%)          | 4 (9.8%)            |
| Hypertension                                   | 1389 (42.6%)         | 2266 (53.6%)         | 659 (54.5%)          | 12 (29.3%)          |
| Heart Failure                                  | 298 (9.1%)           | 482 (11.4%)          | 176 (14.5%)          | 4 (9.8%)            |
| COPD                                           | 476 (14.6%)          | 739 (17.5%)          | 209 (17.3%)          | 4 (9.8%)            |
| Cancer                                         | 814 (24.9%)          | 1314 (29.2%)         | 236 (19.5%)          | 6 (8.1%)            |
| End stage renal disease                        | 27 (0.8%)            | 28 (0.7%)            | 22 (1.8%)            | 0 (0.0%)            |
| Venous thromboembolism                         | 979 (30.0%)          | 1144 (27.1%)         | 446 (36.9%)          | 18 (43.9%)          |
| Coronary artery disease                        | 362 (11.1%)          | 743 (17.6%)          | 108 (8.9%)           | 2 (4.9%)            |
| Smoking history                                | 1743 (53.4%)         | 2274 (53.8%)         | 726 (60.0%)          | 26 (63.4%)          |
| Body mass index $\geq$ 35 kg/m <sup>2</sup>    | 1136 (34.8%)         | 1166 (27.6%)         | 454 (37.5%)          | 17 (41.5%)          |
| Postoperative period†                          | 910 (27.9%)          | 1169 (27.6%)         | 304 (25.1%)          | 9 (22.0%)           |
| <b>Medications prior to hospital admission</b> |                      |                      |                      |                     |
| Aspirin                                        | 830 (25.4%)          | 1420 (33.6%)         | 284 (23.5%)          | 3 (7.3%)            |
| Anticoagulation‡                               | 313 (9.6%)           | 445 (10.5%)          | 179 (14.8%)          | 4 (9.8%)            |
| <b>Hospital admission §</b>                    |                      |                      |                      |                     |
| <b>Vital signs</b>                             |                      |                      |                      |                     |
| Heart rate, beats per minute                   | 94.8 ( $\pm$ 20.1)   | 93.2 ( $\pm$ 19.9)   | 95.5 ( $\pm$ 20.5)   | 97.4 ( $\pm$ 21.1)  |
| Systolic blood pressure, mm Hg                 | 134.8 ( $\pm$ 23.4)  | 136.1 ( $\pm$ 25.4)  | 137.6 ( $\pm$ 25.0)  | 127.1 ( $\pm$ 26.1) |
| Laboratory value                               |                      |                      |                      |                     |

|                                          |                |                |                |                 |
|------------------------------------------|----------------|----------------|----------------|-----------------|
| Troponin-I, ng/mL                        | 0.3 (±0.8)     | 0.6 (±11.5)    | 0.3 (±1.1)     | 1.0 (±2.6)      |
| B-type Natriuretic Peptide, pg/mL        | 277.6 (±465.0) | 403.4 (±537.1) | 354.2 (±593.3) | 570.4 (±1202.3) |
| Creatinine, mg/dL                        | 1.0 (±0.7)     | 1.0 (±0.6)     | 1.2 (±1.2)     | 0.9 (±0.3)      |
| Hemoglobin, g/dL                         | 12.2 (±2.0)    | 12.1 (±2.0)    | 11.7 (±2.1)    | 11.9 (±1.7)     |
| International normalized ratio           | 1.2 (±0.6)     | 1.3 (±0.5)     | 1.3 (±0.6)     | 1.2 (±0.3)      |
| <b>Treating hospital characteristics</b> |                |                |                |                 |
| Intensive care admission                 | 826 (25.3%)    | 1135 (26.8%)   | 310 (25.6%)    | 12 (29.3%)      |
| Vasopressor exposure                     | 115 (3.5%)     | 155 (3.7%)     | 51 (4.2%)      | 1 (2.4%)        |
| Relevant consultation                    | 539 (16.5%)    | 468 (11.1%)    | 167 (13.8%)    | 4 (9.8%)        |
| Pulmonology                              | 356 (10.9%)    | 273 (6.5%)     | 96 (7.9%)      | 1 (2.4%)        |
| Cardiology                               | 200 (6.1%)     | 199 (4.7%)     | 63 (5.2%)      | 2 (4.9%)        |
| Vascular surgery                         | 41 (1.3%)      | 44 (1.0%)      | 23 (1.9%)      | 1 (2.4%)        |
| Cardiothoracic surgery                   | 18 (0.6%)      | 17 (0.4%)      | 7 (0.6%)       | 0 (0.0%)        |
| Admission echocardiogram                 | 1658 (50.8%)   | 2272 (53.7%)   | 578 (47.8%)    | 17 (41.5%)      |
| Right heart strain                       | 443 (26.7%)    | 629 (27.7%)    | 156 (27.0%)    | 9 (52.9%)       |
| Treating hospital bed size               |                |                |                |                 |
| Large                                    | 2444 (74.9%)   | 3089 (73.1%)   | 1028 (85.0%)   | 34 (82.9%)      |
| Medium                                   | 518 (15.9%)    | 688 (16.3%)    | 125 (10.3%)    | 7 (17.1%)       |
| Small                                    | 302 (9.3%)     | 451 (10.7%)    | 57 (4.7%)      | 0 (0.0%)        |
| Admission year                           |                |                |                |                 |
| 2012                                     | 220 (6.7%)     | 245 (5.8%)     | 101 (8.3%)     | 4 (9.8%)        |
| 2013                                     | 276 (8.5%)     | 336 (7.9%)     | 111 (9.2%)     | 5 (12.2%)       |
| 2014                                     | 406 (12.4%)    | 489 (11.6%)    | 138 (11.4%)    | 6 (14.6%)       |
| 2015                                     | 440 (13.5%)    | 561 (13.3%)    | 159 (13.1%)    | 2 (4.9%)        |
| 2016                                     | 497 (15.2%)    | 643 (15.2%)    | 162 (13.4%)    | 5 (12.2%)       |
| 2017                                     | 500 (15.3%)    | 681 (16.1%)    | 194 (16.0%)    | 6 (14.6%)       |
| 2018                                     | 495 (15.2%)    | 659 (15.6%)    | 179 (14.8%)    | 5 (12.2%)       |
| 2019                                     | 430 (13.2%)    | 614 (14.5%)    | 166 (13.7%)    | 8 (19.5%)       |

\* Includes a pre-hospitalization stroke or transient ischemic attack, as defined by *International Classification of Diseases – Clinical Management* of the 9<sup>th</sup> or 10<sup>th</sup> editions.

† Any surgical intervention in the 90 days prior to pulmonary embolism hospitalization

‡ Anti-coagulation therapies include the presence of warfarin, dabigatran, rivaroxaban, edoxaban, apixiaban prior to admission.

§ Maximum initially recorded vital sign or resulted laboratory value which first resulted upon admission to the transferring or treating hospital. || Hospital bed size is based upon the admission capacity (i.e., hospital beds), rural or urban location, and teaching status.<sup>19</sup>

COPD indicates, chronic obstructive pulmonary disease.

**Table S5. Baseline and hospitalization data for each pulmonary embolism presenting severity category, by race in the matched cohort.**

| Preoperative Variables                         | Low                |                    | Intermediate       |                    | High               |                    |
|------------------------------------------------|--------------------|--------------------|--------------------|--------------------|--------------------|--------------------|
|                                                | White (n=417)      | Black (n=146)      | White (n=2705)     | Black (n=1005)     | White (n=142)      | Black (n=59)       |
| <b>Demographics</b>                            |                    |                    |                    |                    |                    |                    |
| Age, years                                     | 51.1 ( $\pm$ 14.7) | 48.5 ( $\pm$ 16.2) | 57.5 ( $\pm$ 17.2) | 55.9 ( $\pm$ 17.4) | 61.8 ( $\pm$ 16.0) | 58.7 ( $\pm$ 18.4) |
| Female sex                                     | 195 (46.8%)        | 61 (41.8%)         | 1489 (55.0%)       | 571 (56.8%)        | 85 (59.9%)         | 40 (67.8%)         |
| Hispanic ethnicity                             | 4 (1.0%)           | 0 (0.0%)           | 15 (0.6%)          | 4 (0.4%)           | 1 (0.7%)           | 0 (0.0%)           |
| Area of deprivation index                      | 60.7 ( $\pm$ 23.3) | 77.9 ( $\pm$ 24.6) | 58.4 ( $\pm$ 23.5) | 81.3 ( $\pm$ 20.7) | 60.1 ( $\pm$ 25.4) | 76.5 ( $\pm$ 24.0) |
| <b>Insurance</b>                               |                    |                    |                    |                    |                    |                    |
| Commercial                                     | 202 (48.4%)        | 26 (17.8%)         | 1035 (38.3%)       | 190 (18.9%)        | 37 (26.1%)         | 15 (25.4%)         |
| Medicaid                                       | 80 (19.2%)         | 58 (39.7%)         | 403 (14.9%)        | 323 (32.1%)        | 21 (14.8%)         | 14 (23.7%)         |
| Medicare                                       | 120 (28.8%)        | 46 (31.5%)         | 1194 (44.1%)       | 442 (44.0%)        | 81 (57.0%)         | 29 (49.2%)         |
| Self-Pay/ Other                                | 15 (3.6%)          | 16 (11.0%)         | 73 (2.7%)          | 50 (5.0%)          | 3 (2.1%)           | 1 (1.7%)           |
| <b>Comorbid conditions</b>                     |                    |                    |                    |                    |                    |                    |
| Cerebrovascular event*                         | 18 (4.3%)          | 11 (7.5%)          | 177 (6.5%)         | 97 (9.7%)          | 13 (9.2%)          | 7 (11.9%)          |
| Diabetes mellitus                              | 43 (10.3%)         | 22 (15.1%)         | 458 (16.9%)        | 230 (22.9%)        | 31 (21.8%)         | 13 (22.0%)         |
| Hypertension                                   | 145 (34.8%)        | 57 (39.0%)         | 1167 (43.1%)       | 569 (56.6%)        | 77 (54.2%)         | 33 (55.9%)         |
| Heart Failure                                  | NA                 | NA                 | 272 (10.1%)        | 164 (16.3%)        | 26 (18.3%)         | 12 (20.3%)         |
| COPD                                           | NA                 | NA                 | 451 (16.7%)        | 197 (19.6%)        | 25 (17.6%)         | 12 (20.3%)         |
| Cancer                                         | NA                 | NA                 | 783 (28.9%)        | 225 (22.4%)        | 31 (21.8%)         | 11 (18.6%)         |
| End stage renal disease                        | 1 (0.2%)           | 4 (2.7%)           | 24 (0.9%)          | 16 (1.6%)          | 2 (1.4%)           | 2 (3.4%)           |
| Venous thromboembolism                         | 134 (32.1%)        | 60 (41.1%)         | 805 (29.8%)        | 371 (36.9%)        | 40 (28.2%)         | 15 (26.3%)         |
| Coronary artery disease                        | 37 (8.9%)          | 3 (2.1%)           | 304 (11.2%)        | 101 (10.0%)        | 21 (14.8%)         | 4 (6.8%)           |
| Smoking history                                | 218 (52.3%)        | 88 (60.3%)         | 1463 (54.1%)       | 608 (60.5%)        | 62 (43.7%)         | 30 (52.6%)         |
| Body mass index $\geq$ 35 kg/m <sup>2</sup>    | 143 (34.3%)        | 44 (30.1%)         | 936 (34.6%)        | 388 (38.6%)        | 57 (40.1%)         | 22 (37.3%)         |
| Postoperative period†                          | 84 (20.1%)         | 25 (17.1%)         | 779 (28.8%)        | 254 (25.3%)        | 47 (33.1%)         | 25 (42.4%)         |
| <b>Medications prior to hospital admission</b> |                    |                    |                    |                    |                    |                    |
| Aspirin                                        | 86 (20.6%)         | 14 (9.6%)          | 699 (25.8%)        | 255 (22.4%)        | 45 (31.7%)         | 15 (28.8%)         |
| Anticoagulation‡                               | 42 (10.1%)         | 22 (15.1%)         | 253 (9.4%)         | 149 (14.8%)        | 18 (12.7%)         | 8 (15.4%)          |
| <b>Hospital admission §</b>                    |                    |                    |                    |                    |                    |                    |
| Vital signs                                    |                    |                    |                    |                    |                    |                    |

|                                          |                     |                     |                      |                      |                      |                      |
|------------------------------------------|---------------------|---------------------|----------------------|----------------------|----------------------|----------------------|
| Heart rate, beats per minute             | 85.9 ( $\pm$ 13.4)  | 85.7 ( $\pm$ 13.7)  | 95.7 ( $\pm$ 20.3)   | 96.5 ( $\pm$ 20.4)   | 102.5 ( $\pm$ 24.7)  | 103.4 ( $\pm$ 27.5)  |
| Systolic blood pressure, mm Hg           | 138.5 ( $\pm$ 20.8) | 138.7 ( $\pm$ 20.7) | 135.4 ( $\pm$ 23.0)  | 138.7 ( $\pm$ 24.5)  | 112.9 ( $\pm$ 26.4)  | 115.5 ( $\pm$ 32.3)  |
| Laboratory value                         |                     |                     |                      |                      |                      |                      |
| Troponin-I, ng/mL                        | 0.0 ( $\pm$ 0.0)    | 0.1 ( $\pm$ 0.0)    | 0.3 ( $\pm$ 0.8)     | 0.3 ( $\pm$ 0.9)     | 0.9 ( $\pm$ 1.5)     | 1.4 ( $\pm$ 3.2)     |
| B-type Natriuretic Peptide, pg/mL        | 34.2 ( $\pm$ 24.7)  | 33.1 ( $\pm$ 29.4)  | 294.9 ( $\pm$ 443.0) | 360.5 ( $\pm$ 547.8) | 585.3 ( $\pm$ 824.8) | 695.3 ( $\pm$ 977.7) |
| Creatinine, mg/dL                        | 0.9 ( $\pm$ 0.3)    | 1.2 ( $\pm$ 1.5)    | 1.0 ( $\pm$ 0.7)     | 1.1 ( $\pm$ 1.2)     | 1.5 ( $\pm$ 1.0)     | 1.7 ( $\pm$ 1.2)     |
| Hemoglobin, g/dL                         | 12.8 ( $\pm$ 1.7)   | 12.3 ( $\pm$ 2.1)   | 12.1 ( $\pm$ 2.0)    | 11.7 ( $\pm$ 2.0)    | 11.6 ( $\pm$ 2.3)    | 11.4 ( $\pm$ 2.9)    |
| International normalized ratio           | 1.2 ( $\pm$ 0.2)    | 1.2 ( $\pm$ 0.2)    | 1.2 ( $\pm$ 0.4)     | 1.2 ( $\pm$ 0.4)     | 2.0 ( $\pm$ 2.0)     | 1.9 ( $\pm$ 1.6)     |
| <b>Treating hospital characteristics</b> |                     |                     |                      |                      |                      |                      |
| Intensive care admission                 | NA                  | NA                  | 1783 (65.9%)         | 826 (82.2%)          | 118 (83.1%)          | 52 (88.1%)           |
| Vasopressor exposure                     | NA                  | NA                  | NA                   | NA                   | 115 (81.0%)          | 51 (86.4%)           |
| Relevant consultation                    | 86 (20.6%)          | 18 (12.3%)          | 1376 (50.9%)         | 479 (47.7%)          | 23 (16.2%)           | 13 (22.0%)           |
| Pulmonology                              | 57 (13.7%)          | 13 (8.9%)           | 410 (15.2%)          | 139 (13.8%)          | 9 (6.3%)             | 6 (10.2%)            |
| Cardiology                               | 31 (7.4%)           | 5 (3.4%)            | 1376 (50.9%)         | 479 (47.7%)          | 13 (9.2%)            | 6 (10.2%)            |
| Vascular surgery                         | 3 (0.7%)            | 1 (0.7%)            | 410 (15.2%)          | 139 (13.8%)          | 2 (1.4%)             | 3 (5.1%)             |
| Cardiothoracic surgery                   | 3 (0.7%)            | 0 (0.0%)            | 1376 (50.9%)         | 479 (47.7%)          | 6 (4.2%)             | 0 (0.0%)             |
| Admission echocardiogram                 | 213 (51.1%)         | 62 (42.5%)          | 1376 (50.9%)         | 479 (47.7%)          | 69 (48.6%)           | 37 (62.7%)           |
| Right heart strain                       | NA                  | NA                  | 410 (29.8%)          | 139 (29.0%)          | 33 (47.8%)           | 17 (45.9%)           |
| Treating hospital bed size               |                     |                     |                      |                      |                      |                      |
| Large                                    | 302 (72.4%)         | 121 (82.9%)         | 2026 (74.9%)         | 855 (85.1%)          | 116 (81.7%)          | 52 (88.1%)           |
| Medium                                   | 78 (18.7%)          | 18 (12.3%)          | 423 (15.6%)          | 101 (10.0%)          | 17 (12.0%)           | 6 (10.2%)            |
| Small                                    | 37 (8.9%)           | 7 (4.8%)            | 256 (9.5%)           | 49 (4.9%)            | 9 (6.3%)             | 1 (1.7%)             |
| Admission year                           |                     |                     |                      |                      |                      |                      |
| 2012                                     | 23 (5.5%)           | 10 (6.8%)           | 190 (7.0%)           | 86 (8.6%)            | 7 (4.9%)             | 5 (8.5%)             |
| 2013                                     | 33 (7.9%)           | 20 (13.7%)          | 227 (8.4%)           | 83 (8.3%)            | 16 (11.3%)           | 8 (13.6%)            |
| 2014                                     | 62 (14.9%)          | 18 (12.3%)          | 327 (12.1%)          | 110 (10.9%)          | 17 (12.0%)           | 10 (16.9%)           |
| 2015                                     | 54 (12.9%)          | 16 (11.0%)          | 367 (13.6%)          | 134 (13.3%)          | 19 (13.4%)           | 9 (15.3%)            |
| 2016                                     | 53 (12.7%)          | 27 (18.5%)          | 423 (15.6%)          | 129 (12.8%)          | 21 (14.8%)           | 6 (10.2%)            |
| 2017                                     | 69 (16.5%)          | 15 (10.3%)          | 416 (15.4%)          | 170 (16.9%)          | 15 (10.6%)           | 9 (15.3%)            |
| 2018                                     | 72 (17.3%)          | 25 (17.1%)          | 396 (14.6%)          | 146 (14.5%)          | 27 (19.0%)           | 8 (13.6%)            |
| 2019                                     | 51 (12.2%)          | 15 (10.3%)          | 359 (13.3%)          | 147 (14.6%)          | 20 (14.1%)           | 4 (6.8%)             |



\* Includes a pre-hospitalization stroke or transient ischemic attack, as defined by *International Classification of Diseases – Clinical Management* of the 9<sup>th</sup> or 10<sup>th</sup> editions.

† Any surgical intervention in the 90 days prior to pulmonary embolism hospitalization

‡ Anti-coagulation therapies include the presence of warfarin, dabigatran, rivaroxaban, edoxaban, apixaban prior to admission.

§ Maximal initially recorded vital sign or resulted laboratory value which first resulted upon admission to the transferring or treating hospital.

|| Hospital bed size is based upon the admission capacity (i.e., hospital beds), rural or urban location, and teaching status.<sup>19</sup>

NA indicates, not applicable; COPD, chronic obstructive pulmonary disease.

**Table S6. Multivariable model for primary outcome in the matched cohort.**

| Covariates                   | Matched on age and sex |                |      | Matched and adjusted for clinical characteristics |                |       | Matched and adjusted for clinical and socioeconomic characteristics |                |       |
|------------------------------|------------------------|----------------|------|---------------------------------------------------|----------------|-------|---------------------------------------------------------------------|----------------|-------|
|                              | OR                     | 95%CI          | P    | OR                                                | 95%CI          | P     | OR                                                                  | 95%CI          | P     |
| Black (White)                | 1.08                   | (1.03-1.14)    | .003 | 1.13                                              | (1.01-1.27)    | .003  | 1.05                                                                | (1.05-1.35)    | .002  |
| Age                          |                        |                |      | 1.02                                              | (1.02-1.02)    | <.001 | 1.02                                                                | (1.02-1.02)    | <.001 |
| Female (Male)                |                        |                |      | 1.45                                              | (1.28-1.63)    | <.001 | 1.22                                                                | (1.22-1.63)    | <.001 |
| Postoperative 90 days        |                        |                |      | 1.61                                              | (1.40-1.85)    | <.001 | 1.36                                                                | (1.36-1.78)    | <.001 |
| BMI>35mg/kg <sup>2</sup>     |                        |                |      | 1.22                                              | (1.10-1.36)    | <.001 | 1.07                                                                | (1.07-1.30)    | .001  |
| Prior venous thromboembolism |                        |                |      | 0.99                                              | (0.92-1.06)    | .715  | 0.93                                                                | (0.93-1.09)    | .887  |
| Aspirin                      |                        |                |      | 1.18                                              | (1.08-1.30)    | <.001 | 1.12                                                                | (1.12-1.25)    | <.001 |
| Area of Deprivation Index    |                        |                |      |                                                   |                |       | 0.99                                                                | (0.99-1.01)    | .252  |
| Insurance (Private)          |                        |                |      |                                                   |                |       |                                                                     |                |       |
| Medicaid                     |                        |                |      |                                                   |                |       | 0.87                                                                | (0.87-1.37)    | .446  |
| Medicare                     |                        |                |      |                                                   |                |       | 1.07                                                                | (1.07-1.31)    | .001  |
| Self-pay/other               |                        |                |      |                                                   |                |       | 0.50                                                                | (0.50 -1.22)   | .275  |
| Constant, cut 1              | -1.92                  | (-2.03- -1.81) |      | -0.50                                             | (-0.95- -0.04) |       | -0.37                                                               | (-0.58- -0.15) |       |
| Constant, cut 2              | 3.08                   | (2.89-3.27)    |      | 4.81                                              | (4.30-5.33)    |       | 4.91                                                                | (4.63-5.19)    |       |

All models are clustered on hospital size, as quantified by the National Inpatient Sample, accounting for bed size, rurality, and teaching status of each hospital.<sup>19</sup> OR indicates, odds ratio; CI, confidence Interval; BMI, body mass index.

**Table S7. Multivariable model for any intervention\* in the matched cohort.**

| Covariates                   | Matched on age and sex |             |       | Matched and adjusted for clinical characteristics |             |       | Matched and adjusted for clinical and socioeconomic characteristics |             |       |
|------------------------------|------------------------|-------------|-------|---------------------------------------------------|-------------|-------|---------------------------------------------------------------------|-------------|-------|
|                              | SHR <sup>†</sup>       | 95%CI       | P     | SHR                                               | 95%CI       | P     | SHR                                                                 | 95%CI       | P     |
| Black (White)                | 0.77                   | (0.66-0.89) | <.001 | 0.73                                              | (0.64-0.84) | <.001 | 0.77                                                                | (0.60-0.98) | .03   |
| Age                          |                        |             |       | 1.00                                              | (0.99-1.01) | .51   | 1.00                                                                | (0.99-1.01) | .61   |
| Female (Male)                |                        |             |       | 0.71                                              | (0.62-0.80) | <.001 | 0.69                                                                | (0.61-0.77) | <.001 |
| Postoperative 90 days        |                        |             |       | 1.19                                              | (1.02-1.38) | .03   | 1.19                                                                | (1.03-1.38) | .02   |
| BMI>35mg/kg <sup>2</sup>     |                        |             |       | 1.26                                              | (1.08-1.47) | .003  | 1.23                                                                | (1.12-1.34) | <.001 |
| Prior venous thromboembolism |                        |             |       | 1.34                                              | (1.05-1.71) | .02   | 1.31                                                                | (1.00-1.73) | .05   |
| Aspirin                      |                        |             |       | 0.86                                              | (0.76-0.97) | .01   | 0.86                                                                | (0.77-0.96) | .008  |
| Area of Deprivation Index    |                        |             |       |                                                   |             |       | 1.00                                                                | (0.99-1.01) | .92   |
| Insurance (Private)          |                        |             |       |                                                   |             |       |                                                                     |             |       |
| Medicaid                     |                        |             |       |                                                   |             |       | 1.05                                                                | (0.99-1.12) | .11   |
| Medicare                     |                        |             |       |                                                   |             |       | 1.06                                                                | (0.85-1.33) | .61   |
| Self-pay/other               |                        |             |       |                                                   |             |       | 0.96                                                                | (0.58-1.58) | .87   |

All models are clustered on hospital size, as quantified by the National Inpatient Sample, accounting for bed size, rurality, and teaching status of each hospital.<sup>19</sup>

SHR indicates, subdistribution hazard ratio; CI, confidence Interval; BMI, body mass index.

\*All procedures including systemic thrombolysis, inferior vena cava filters, surgical embolectomy, and catheter directed therapy (CTD).

†Of note, the reported subdistribution hazard ratios are reported to demonstrate the direction of the effect, their quantification of the magnitude of this effect on the cumulative incidence is only approximately correct.

**Table S8. Multivariable model for primary outcome in the full (non-matched) cohort.**

| Covariates                   | Unadjusted |              | Adjusted for age and sex |               | Adjusted for clinical characteristics |              | Adjusted for clinical and socioeconomic characteristics |               |
|------------------------------|------------|--------------|--------------------------|---------------|---------------------------------------|--------------|---------------------------------------------------------|---------------|
|                              | OR         | 95%CI        | OR                       | 95%CI         | OR                                    | 95%CI        | OR                                                      | 95%CI         |
| Black (White)                | 0.91       | (0.86-0.96)  | 1.10                     | (1.01-1.19)   | 1.12                                  | (1.01-1.25)  | 1.12                                                    | (0.98-1.27)   |
| Age                          |            |              | 1.02                     | (1.02-1.02)   | 1.02                                  | (1.02-1.02)  | 1.02                                                    | (1.02-1.02)   |
| Female (Male)                |            |              | 1.29                     | (1.24-1.34)   | 1.30                                  | (1.24-1.36)  | 1.27                                                    | (1.22-1.32)   |
| Postoperative 90 days        |            |              |                          |               | 1.59                                  | (1.38-1.83)  | 1.6                                                     | (1.38-1.85)   |
| BMI>35mg/kg <sup>2</sup>     |            |              |                          |               | 1.12                                  | (1.07-1.17)  | 1.09                                                    | (1.02-1.16)   |
| Prior venous thromboembolism |            |              |                          |               | 0.92                                  | (0.82-1.03)  | 0.95                                                    | (0.84-1.08)   |
| Aspirin                      |            |              |                          |               | 1.08                                  | (1.06-1.10)  | 1.06                                                    | (1.00-1.12)   |
| Area of Deprivation Index    |            |              |                          |               |                                       |              | 1.00                                                    | (1.00-1.01)   |
| Insurance (Private)          |            |              |                          |               |                                       |              |                                                         |               |
| Medicaid                     |            |              |                          |               |                                       |              | 1.23                                                    | (0.94-1.62)   |
| Medicare                     |            |              |                          |               |                                       |              | 1.16                                                    | (1.02-1.32)   |
| Self-pay/other               |            |              |                          |               |                                       |              | 0.96                                                    | (0.65-1.42)   |
| Constant, cut 1              | -2.09      | (-2.2--1.98) | -0.53                    | (-0.66--0.39) | -0.43                                 | (-0.6--0.25) | -0.34                                                   | (-0.60--0.07) |
| Constant, cut 2              | 2.95       | (2.73-3.17)  | 4.67                     | (4.41-4.94)   | 4.9                                   | (4.58-5.21)  | 5.03                                                    | (4.62-5.43)   |

All models are clustered on hospital size, as quantified by the National Inpatient Sample, accounting for bed size, rurality, and teaching status of each hospital.<sup>19</sup>

OR indicates, odds ratio; CI, confidence Interval; BMI, body mass index.

**Figure S1. Distribution of patients by age after matching.**

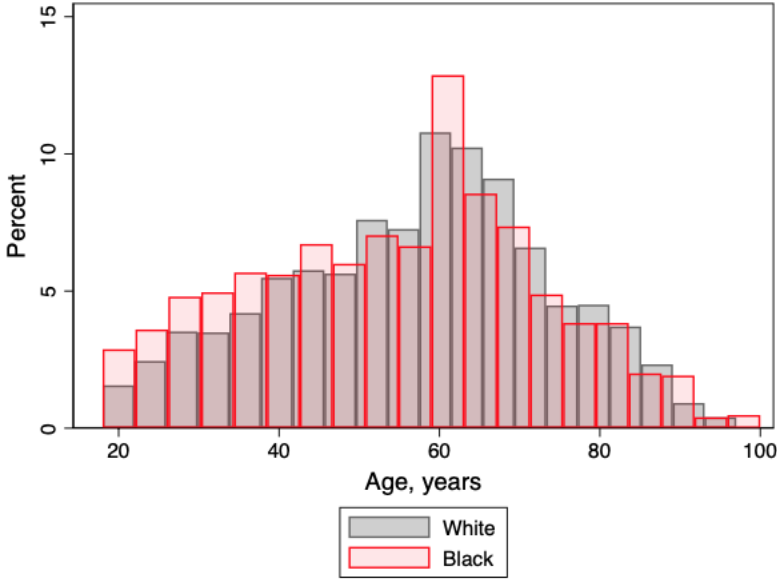

After matching, Black patients (red) continue to be hospitalized for pulmonary embolism at a younger age than White (gray) patients, although the difference is less pronounced than with the unmatched cohort.
